# Supplementary material for: Plasma microRNA ratios associated with breast cancer detection in a nested case–control study from a mammography screening cohort
Source: PubMed Central journal article supplement (PMC10368693; doi:10.1038/s41598-023-38886-0), 2023-07-25
Supplement: 41598_2023_38886_MOESM2_ESM.pdf [file 41598_2023_38886_MOESM2_ESM.pdf]

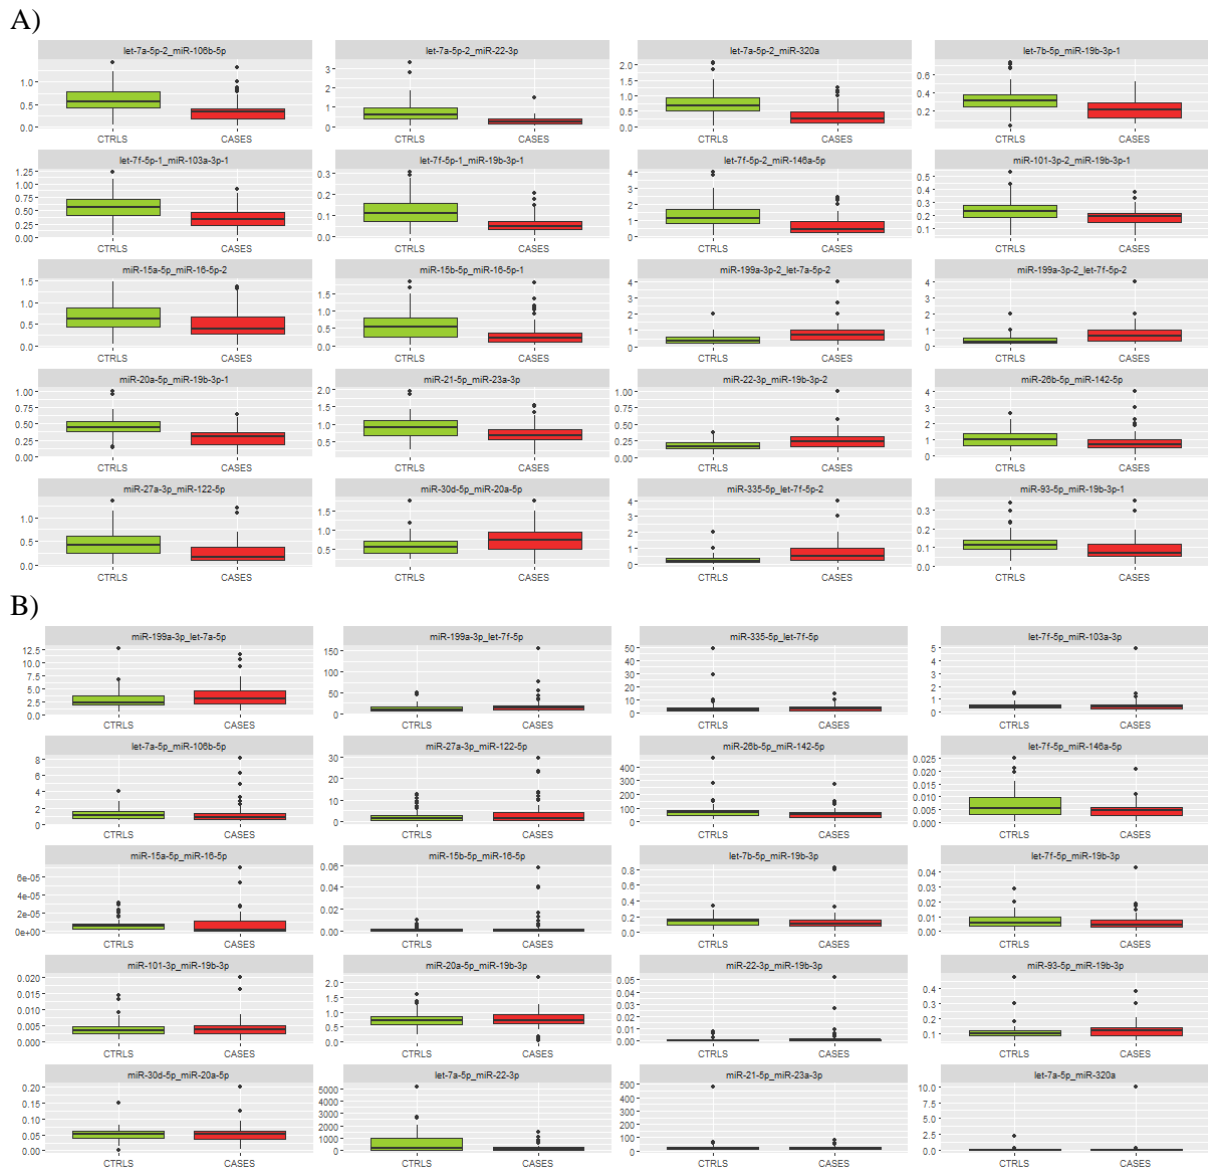

Figure S.1 Boxplot for miR ratios on small-RNA sequencing (panel A) and q-RT-PCR (panel B) data in cases (red) and controls (green). As ratios on sequencing data originally were not log<sub>2</sub>-transformed, to enable direct comparability of the results, RT-qPCR expression values were reported as 2<sup>Ct</sup>

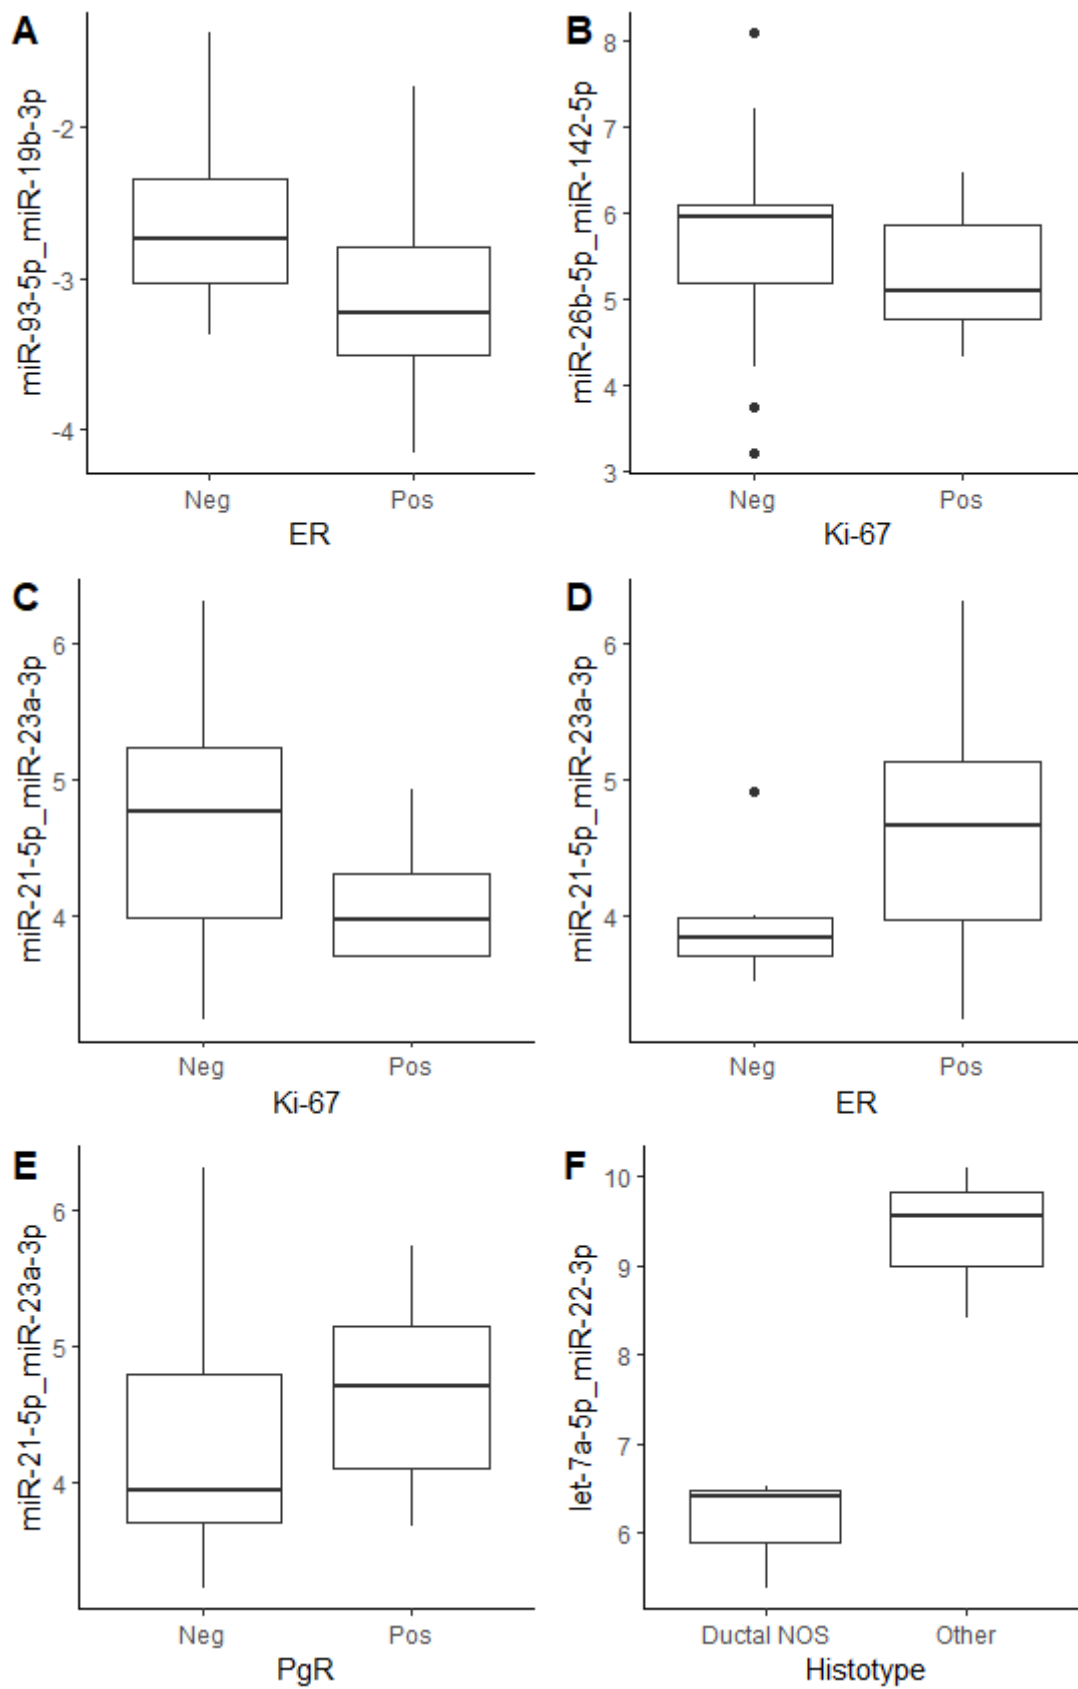

Figure S.2 Expression values for ratio associated with clinico-pathological BC cases characteristics. Panels A-E refer to invasive tumors whereas panel F to *in situ* ones

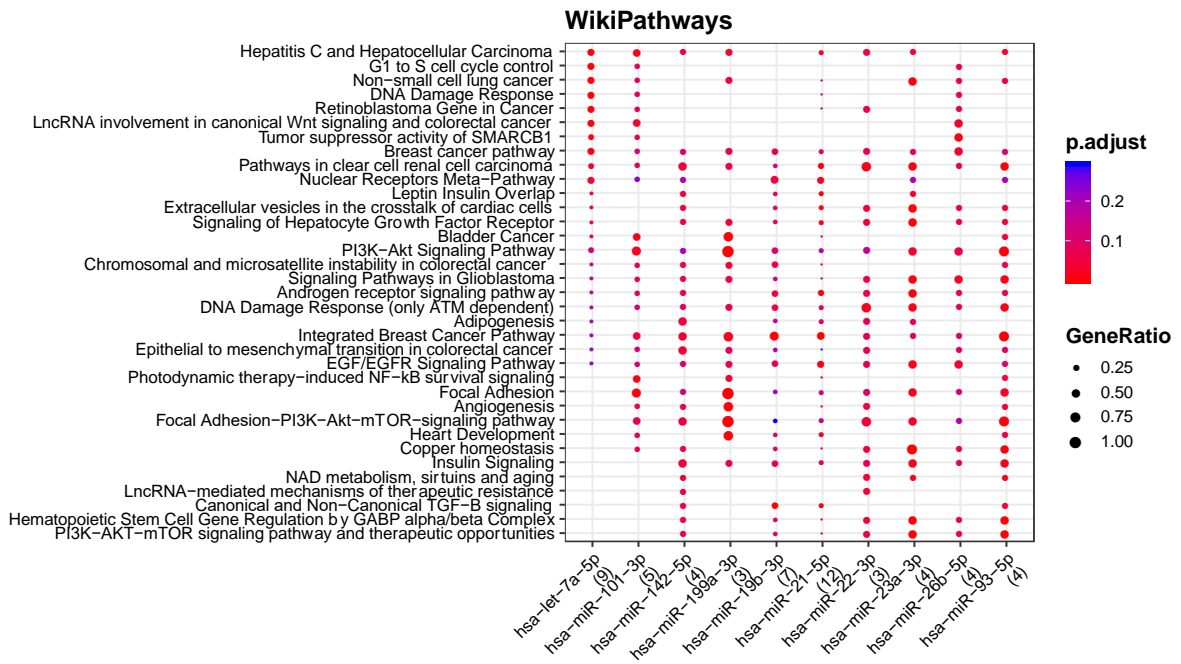

Figure S.3 Functional target enrichment results (Wikipathways database) on miRs making up the ratios within the model including non-molecular variables
